# Supplementary material for: Assembling metal oxide nanocrystals into dense, hollow, porous nanoparticles for lithium-ion and lithium–oxygen battery application
Source: Royal Society of Chemistry journal article supplement (doi:10.1039/c3nr02384b), 2013-01-01
Supplement: c3nr02384b.pdf [file c3nr02384b.pdf]

*Supporting Information for*

**Assembling metal oxide nanocrystals into dense, hollow,  
porous nanoparticles for lithium-ion and lithium-oxygen  
battery application**

*Jun Ming,<sup>a,b,c</sup> Yingqiang Wu,<sup>b,c</sup> Jin-Bum Park,<sup>a</sup> Joong Kee Lee,<sup>e</sup> Fengyu Zhao,<sup>\*b,c</sup> and  
Yang-Kook Sun<sup>\*a,d</sup>*

<sup>a</sup>Department of Energy Engineering, Hanyang University, 133-791, Republic of Korea.

<sup>b</sup>State Key Laboratory of Electroanalytical Chemistry, Changchun Institute of Applied Chemistry, Chinese Academy of Sciences, Changchun 130022, P. R. China.

<sup>c</sup>Laboratory of Green Chemistry and Process, Changchun Institute of Applied Chemistry, Chinese Academy of Sciences, Changchun 130022, P. R. China.

<sup>d</sup>Chemistry Department, King Abdulaziz University, Faculty of Science, Jeddah, Saudi Arabia

<sup>e</sup>Center for Energy Convergence Research, Korea Institute of Science and Technology, Seoul, 136-791, Republic of Korea

## **MATERIALS CHARACTERIZATION**

The crystallographic information was investigated by XRD patterns, which were measured on a Bruker D8 GADDS diffractometer using Co K $\alpha$  radiation (1.79 Å). The particle dispersion and morphology were characterized by field emission scanning electron microscopy (FESEM), which was taken on a XL30 ESEM microscope at a beam energy of 20 kV. The core-shell and hollow structures were characterized by transmission electron microscopy (TEM) using a JEOL-2100F microscope operated at 200 kV. The surface area and porosity of dense hollow porous nanoparticles were determined using a Quantachrome Autosorb-iQ-MP automated gas adsorption system using nitrogen as the adsorbate at liquid nitrogen temperature (77 K). The samples were outgassed under vacuum for 24 h at 100°C. The specific surface area was calculated using the Brunauer-Emmett-Teller (BET) method and the pore diameters were obtained from the desorption branch of the isotherm using the Barrett-Joyner-Halenda (BJH) method. The actual mass percent of CoO on C@CoO was analyzed by the thermalgravimetric analysis (TGA, 10 °C min<sup>-1</sup>, air).

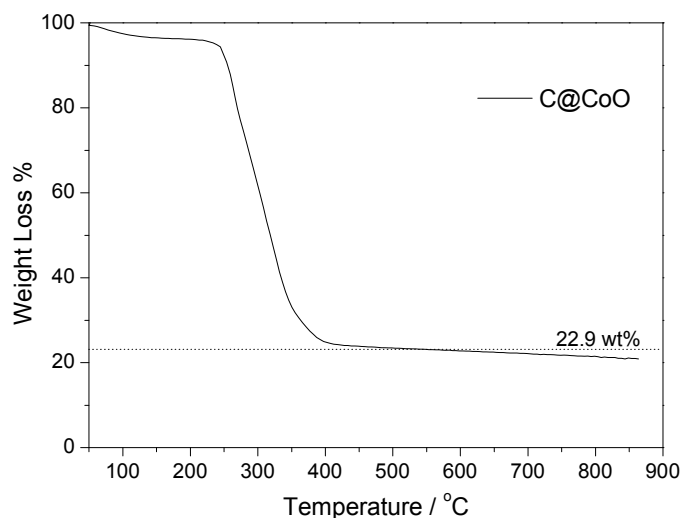

**Figure S1.** Thermalgravimetric analysis (TGA) of C@CoO with a heating rate of  $10\text{ }^{\circ}\text{C min}^{-1}$  in air. The actual mass percent of CoO (22.9 wt%) is higher than theoretic one (18.4%) which was calculated as below:

The mole of Co ( $n_{\text{Co}}$ ):  $n_{\text{Co}} = 0.15\text{ mmol}$  (Experimental parameter);

The molar mass of CoO ( $M_{\text{CoO}}$ ):  $M_{\text{CoO}} = 74.93\text{ g mol}^{-1}$ ;

The mass of CoO ( $m_{\text{CoO}}$ ):  $m_{\text{CoO}} = n_{\text{Co}} \times M_{\text{CoO}} = 0.15\text{ mmol} \times 74.93\text{ g mol}^{-1} = 11.24\text{ mg}$ ;

The mass percent of CoO ( $m_{\text{CoO}}\%$ ):

$$m_{\text{CoO}}\% = m_{\text{CoO}} / (m_{\text{carbon colloids}} + m_{\text{CoO}}) \times 100\% = 11.24 / (50 + 11.24) \times 100\% = 18.4\%.$$

It is reasonable because the carbon colloids (50 mg) are a well-known carbonaceous material which contains a lot of H and O atoms.<sup>Ref.S1-S3</sup> In the  $\text{N}_2$  atmosphere calcination to form C@CoO from C@Co-salt, the carbon colloids will lose a certain amount of C, H and O ( $\text{C} + \text{O} \rightarrow \text{CO}_2/\text{CO}$ ,  $\text{H} + \text{O} \rightarrow \text{H}_2\text{O}$ ), thereby giving rise to a higher actual value than theoretic one.

S1. X. M. Sun and Y.D. Li, *Angew. Chem. Int. Ed.*, 2004, **43**, 597-601

S2. M. Sevilla and A. B. Fuertes, *Carbon*, 2009, **47**, 2281-2289.

S3. J. Ming, R. X. Liu, G. F. Liang, H. Y. Cheng, Y. C. Yu and F. Y. Zhao, *J. Mater. Chem.*, 2011, **21**, 10929-10934.

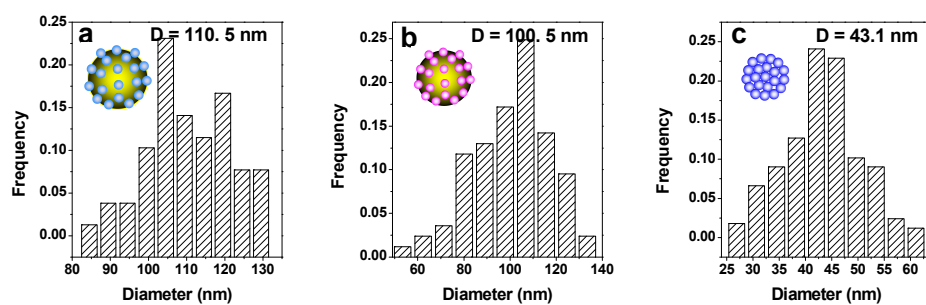

**Figure S2.** Variation of (a) C@Co-salt, (b) C@CoO<sub>x</sub> and (c) DHP Co<sub>3</sub>O<sub>4</sub> nanoparticle diameters.

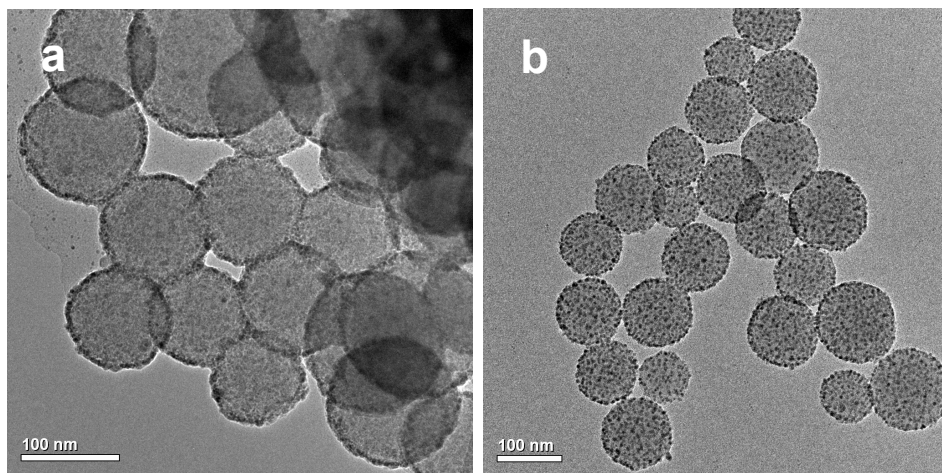

**Figure S3.** TEM images of core-shell structured (a) C@FeO<sub>x</sub> and (b) C@NiO<sub>x</sub> particles.
